# Supplementary material
Source: publisher figshare collection journal article supplement (https://springernature.figshare.com/ndownloader/files/12998387)
Supplement: Supplementary file 1 [file 12998387]

## Sheet: Sheet2
Log2 H/L ratio	Gene name(s)	Protein accession(s)	Protein name(s)
0.01	BIRC2	Q13490	Baculoviral IAP repeat-containing protein 2
-0.07	FAM213A	Q9BRX8	Redox-regulatory protein FAM213A
-0.07	GET4	Q7L5D6	Golgi to ER traffic protein 4 homolog
-0.1	TNFAIP3	P21580	Tumor necrosis factor alpha-induced protein 3
-0.13	AZI2	Q9H6S1	5-azacytidine-induced protein 2
-0.15	TRAF2	Q12933	TNF receptor-associated factor 2
-0.21	TBK1	Q9UHD2	Serine/threonine-protein kinase TBK1
-0.22	UBL4A	P11441	Ubiquitin-like protein 4A
-0.27	DIDO1	Q9BTC0	Death-inducer obliterator 1
-0.33	BAG6	P46379	Large proline-rich protein BAG6
-0.36	TAX1BP1	Q86VP1	Tax1-binding protein 1
-0.39	MYH9	P35579	Myosin-9
-0.4	UBA52;RPS27A;UBB;UBC	P62987;P62979; P0CG47;P0CG48	Ubiquitin-60S ribosomal protein L40;Ubiquitin;60S ribosomal protein L40;Ubiquitin-40S ribosomal protein S27a;Ubiquitin;40S ribosomal protein S27a;Polyubiquitin-B;Ubiquitin;Polyubiquitin-C;Ubiquitin
-0.4	LYN	P07948	Tyrosine-protein kinase Lyn
-0.44	CALCOCO2	Q13137	Calcium-binding and coiled-coil domain-containing protein 2
-0.47	MYL12A;MYL12B;MYL9	P19105;O14950; P24844	Myosin regulatory light chain 12A;Myosin regulatory light chain 12B;Myosin regulatory light polypeptide 9
-0.48	ASNA1	O43681	ATPase ASNA1
-0.52	NGLY1	Q96IV0	Peptide-N(4)-(N-acetyl-beta-glucosaminyl)asparagine amidase
-0.54	ERP44	Q9BS26	Endoplasmic reticulum resident protein 44
-0.59	C14orf166	Q9Y224	UPF0568 protein C14orf166
-0.62	LRRFIP2	Q9Y608	Leucine-rich repeat flightless-interacting protein 2
-0.66	FLOT2	Q14254	Flotillin-2
-0.77	MYH10	P35580	Myosin-10
-0.79	MICAL3	Q7RTP6	Protein-methionine sulfoxide oxidase MICAL3
-0.8	MYL6B	P14649	Myosin light chain 6B
-0.88	HERC2	O95714	E3 ubiquitin-protein ligase HERC2
-0.91	GSN	P06396	Gelsolin
-0.91	TPM1	P09493	Tropomyosin alpha-1 chain
-0.93	KIAA1524	Q8TCG1	Protein CIP2A
-0.94	PSMD7	P51665	26S proteasome non-ATPase regulatory subunit 7
-0.95	MYO1C	O00159	Unconventional myosin-Ic
-0.96	MYO1B	O43795	Unconventional myosin-Ib
Table 9: List of A20 interaction partners from AP-MS experiment with iMixPro labeling design. Proteins for which the log2 H/L ratio for ≥ 75% of the peptides was ≥ -1, were considered as interaction partners of A20. For more details, we refer to Supplementary Figure 2 and Eyckerman et al., J. Proteome Research, 2016.
